# Supplementary material for: Human Milk SARS-CoV-2 Antibodies up to 6 Months After Vaccination
Source: Oxford University Press journal article supplement (doi:10.1542/peds.2021-054260), 2022-01-04
Supplement: peds_2021054260supplementarydata.pdf [file peds_2021054260supplementarydata.pdf]

## Supplemental Information

**SUPPLEMENTAL TABLE 3** Self-Reported Local and Systemic Adverse Effects in 27 Pregnant or Lactating Mothers Who Received COVID-19 mRNA Vaccine

| Adverse Effect                  | 1st Dose, <i>n</i> (%) | 2nd Dose, <i>n</i> (%) |
|---------------------------------|------------------------|------------------------|
| Pain/swelling at injection site | 23 (85.2)              | 16 (59.3)              |
| Fever                           | 1 (3.7)                | 6 (22.2)               |
| Chills                          | 3 (11.1)               | 9 (33.3)               |
| Headache                        | 7 (25.9)               | 11 (40.7)              |
| Fatigue                         | 11 (40.7)              | 14 (51.9)              |
| Body aches                      | 5 (18.5)               | 15 (55.6)              |
| Nausea                          | 1 (3.7)                | 3 (11.1)               |
| Diarrhea                        | 0 (0.0)                | 1 (3.7)                |
